# Supplementary material
Source: MDPI journal article supplement (https://www.mdpi.com/1424-2818/16/5/278)
Supplement: s1 [file s1]

**Household Questionnaire**

Form No. \_\_\_\_\_

NAME OF INTERVIEWER \_\_\_\_\_ VILLAGE/ AREA \_\_\_\_\_

DATE (D/M/Y): \_\_\_\_\_ GPS X□□□□□□□ Y□□□□□□□

START TIME: \_\_\_\_\_ END TIME: \_\_\_\_\_

NAME OF RESPONDENT \_\_\_\_\_

The purpose of this questionnaire is to understand how the local residents in Trans Mara interact with wildlife and utilize their environment to meet their livelihood needs. Any information you provide will be used anonymously. You do not have to answer any question you do not feel comfortable with and you can stop the interview process at any time. You can ask for clarification on any question at any time. This questionnaire is part of an independent study being conducted by Tobias Nyumba, a PhD student from The University of Cambridge in the U.K. We would be very grateful if you could participate. Thank you for your cooperation.

**NATURE RESERVE AND COMMUNITY CONFLICTS IN SELOUS GAME  
RESERVE TOWARD ECOSYSTEM****PART 1- PERSONAL INFORMATION****1. Gender of the respondent**    ☐ Male                      ☐ Female**2. Marital status**            ☐ Single   ☐ Married**3. Family size:** .....**4. Age (in Years)**    ☐ 10-19   ☐ 20-29   ☐ 30-39   ☐ 40-49   ☐ 50-59   ☐ >60**5. Level of education**☐ Junior middle school and below☐ Senior high school☐ Junior college☐ University undergraduate degree☐ Master's degree or above**6. Current occupation**☐ Government or public institution employee☐ Professional and technical staff☐ Industry☐ Merchant☐ Farmer☐ Service industry☐ Freelancer☐ Housewife/ Househusband**7. Name of Village** \_\_\_\_\_**8. How many years have you lived in this community?.....years****9. Distance from settlement to conservation area boundary?**

## **PART 2 COMMUNITY RESIDENTS' ATTITUDES TOWARDS NATURE**

### **RESERVES**

**1.Do you know the location of the Nature Reserve near you?**

☐ Yes ☐ No

Please list the protected area near you\_\_\_\_\_

**2.Do you know any institutes that conduct ecological resource monitoring and protection in your neighborhood (such as Institute of forest , Academy of Sciences and the Administration of the Nature Reserves)?**

☐ Yes ☐ No

**3.Whether conservation policy restrictions affect natural resource use?**

☐ Yes ☐ No

**4.Have participated in protection actions carried out by local governments or NGOs.?**

☐ Yes ☐ No

**5.Have participated in community-organized awareness-raising actions or training on ecosystem conservation in nature reserves ?**

☐ Yes ☐ No

**6.Please choose a score from 1 to 5,which means  
Strongly disagree Mildly disagree Unsure Mildly agree Strongly agree**

a)Community-participatory conservation policies and development measures for protected areas have resulted in increased incomes for the population

b)Knowledge dissemination and technical training provided by the reserve improved the personal qualities and livelihood capacities of the population

c)Protected area conservation policies and development measures improve the conditions of the surrounding natural environment

d)Protected area conservation policies and development measures have increased the capacity of local infrastructure, such as health care and transport, to provide security

**7.Please choose**

a) Support for the establishment and development of nature reserves from the outset.

☐ Yes ☐ No

b) If necessary, I am willing to pay money to improve the protection of Nature Reserves.

☐ Yes ☐ No

c) If necessary, I am willing to devote my spare to improve the protection of the Nature Reserves.

☐ Yes ☐ No

### **Part 3**

#### **1.What Causes of Conservation Conflicts in PAs and its Community**

illiteracy

fuelwood extraction,

animalgrazing,

population increase,

farming and briquetting of charcoal

others

specify-----

#### **2.What cause of Evidence of Conflict in reserve and its community**

##### **Impacts of Conservation Conflicts in PAs and its community**

desertification had the highest

climate change

soil compaction and loss of biodiversity

loss of wildlife habitat while

low rainfall

#### **3.Management strategies for Conservation conflicts in selous reserve and its community is/are**

Rural livelihood programs

Agroforestry practices

forest education

peoples' involvement in policy implementation

good forest management

## **Part 4** .

### **1.income**

Total annual household income: \_\_\_\_\_

Income from agriculture: \_\_\_\_\_

Forestry income: \_\_\_\_\_

Livestock income: \_\_\_\_\_

Income from part-time work: \_\_\_\_\_

Government subsidies: \_\_\_\_\_

Income from tourism: \_\_\_\_\_

Other income: \_\_\_\_\_

### **2.Good conservation of protected areas leads to increased incomes for the population?**

Please choose a score from 1 to 5, which means

Strongly disagree   Mildly disagree   Unsure   Mildly agree   Strongly agree

### **3.Do you live inside or outside the reserve?   ☐ inside   ☐ outside**

### **4.What is the area of your family's agricultural land? How many pieces of land does one have? \_\_\_\_\_**

### **5.What is the area of forestry land in your house? How many pieces of land does one have? \_\_\_\_\_**

### **6.If you are outside the reserve, how far away from the reserve do you grow crops or graze livestock? \_\_\_\_\_**

### **7.Is your livelihood greatly affected by wildlife? 1-5 The greater the impact, the higher the number \_\_\_\_\_**

### **8.What impact does wildlife have on you?**

A.Damage to crops   ☐ Yes ☐ No

B. Harm to livestock   ☐ Yes ☐ No

C. Harm to humans   ☐ Yes ☐ No

D. Damage to houses   ☐ Yes ☐ No

E. Other \_\_\_\_\_

### **9.What are the wild animals that have affected you? (Multiple choice)**

A. carnivores: lions, hyenas, crocodiles, etc.

B.Herbivores: zebra, buffalo, hippopotamus, etc.

C.African elephants

D.Others \_\_\_\_\_

### **10.The wild animal that has had the greatest impact on you is \_\_\_\_\_**
